# Supplementary material
Source: PubMed Central journal article supplement (PMC7929400)
Supplement: aqaa280_supl_supplementary_figures.pdf [file aqaa280_supl_supplementary_figures.pdf]

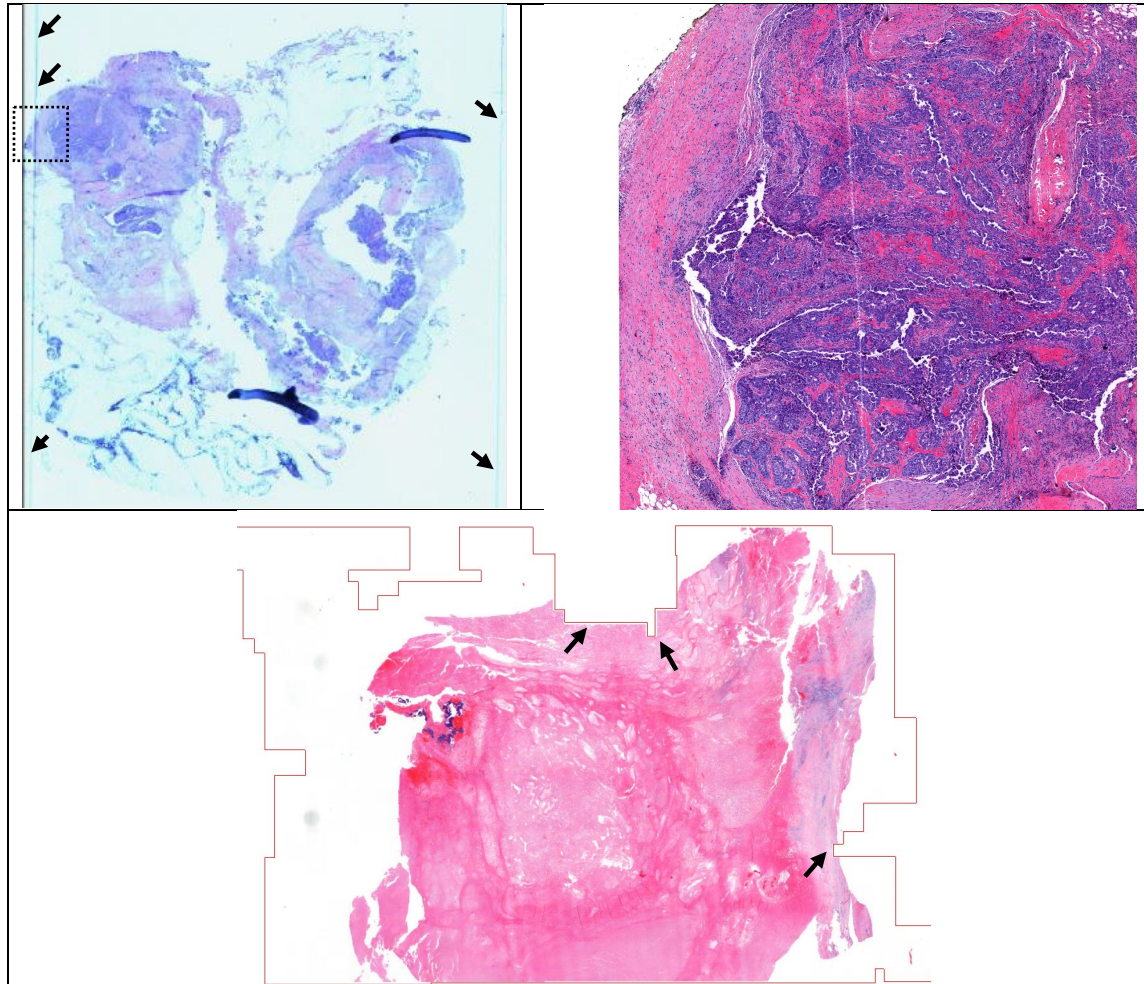

**Figure 1.** Top panel left: Caseviewer 'Scan Preview' for slide with invasive carcinoma. The slide scanner identifies the edge of the coverslip (indicated by arrows) and scans tissue within its bounds. The dashed square indicates portion of tissue with tumor and adjacent margin falling outside the coverslip. Top panel right: Scanned image of area indicated by dashed square (3.1x magnification). Tissue outside the coverslip is excluded and black-inked margin is not present for evaluation. Bottom panel: WSI with 'Slide outline' function in Caseviewer turned on. Running red outline highlights areas at top and right of tissue edges excluded at scanning (indicated by arrows).

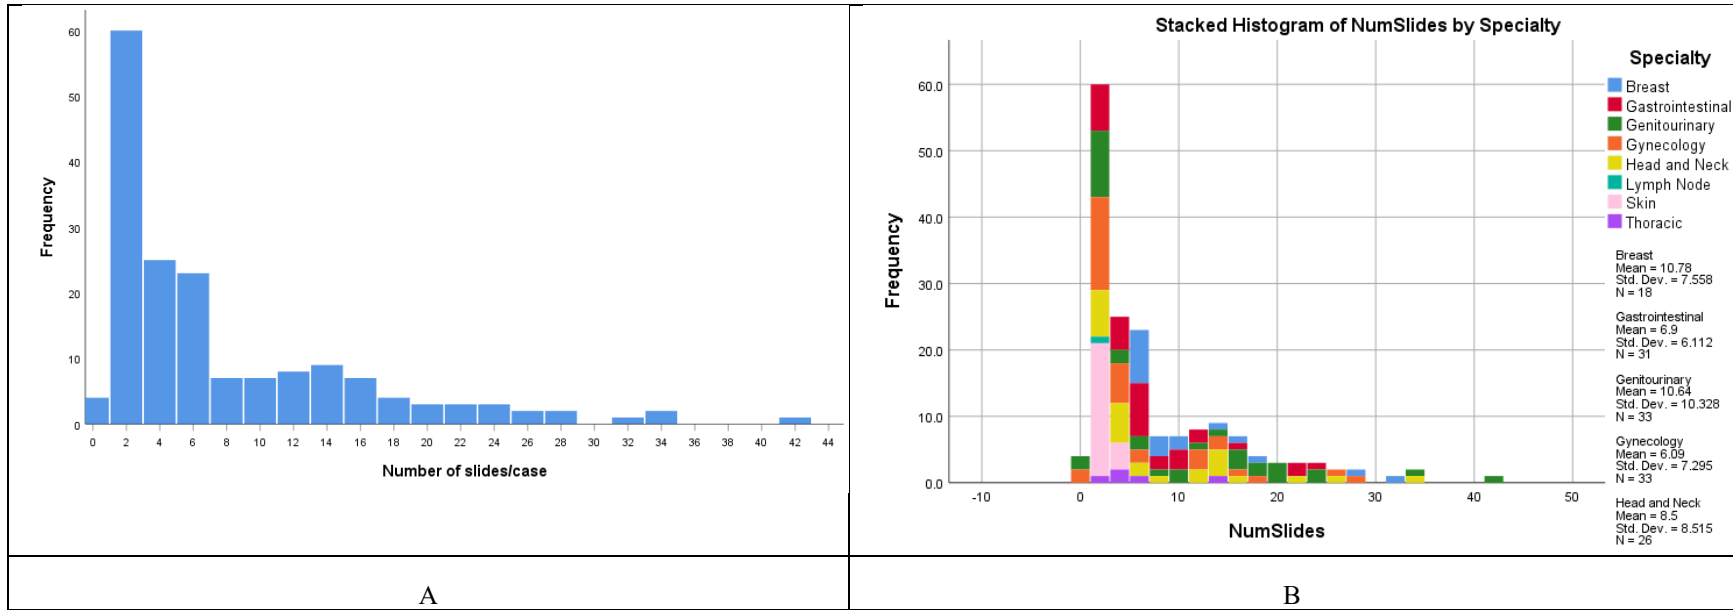

**Figure 2(A-B):** Distribution of number of slides per case (A) and the same shown as stacked histogram by subspecialty

|                                  |                | Pathologist   |               |               |               |               |            |
|----------------------------------|----------------|---------------|---------------|---------------|---------------|---------------|------------|
|                                  |                | Pathologist 1 | Pathologist 2 | Pathologist 3 | Pathologist 4 | Pathologist 5 | Total      |
| Any discrepancy (major or minor) | Agree          | 29            | 31            | 23            | 28            | 32            | 143        |
|                                  | Minor Disagree | 4             | 1             | 7             | 7             | 1             | 20         |
|                                  | Major Disagree | 2             | 1             | 2             | 2             | 1             | 8          |
| <b>Total</b>                     |                | <b>35</b>     | <b>33</b>     | <b>32</b>     | <b>37</b>     | <b>34</b>     | <b>171</b> |

### Chi-Square Tests

|                    | Value  | df | Asymptotic Significance (2-sided) |
|--------------------|--------|----|-----------------------------------|
| Pearson Chi-Square | 11.214 | 8  | 0.190                             |
| Likelihood Ratio   | 12.271 | 8  | 0.140                             |
| N of Valid Cases   | 171    |    |                                   |

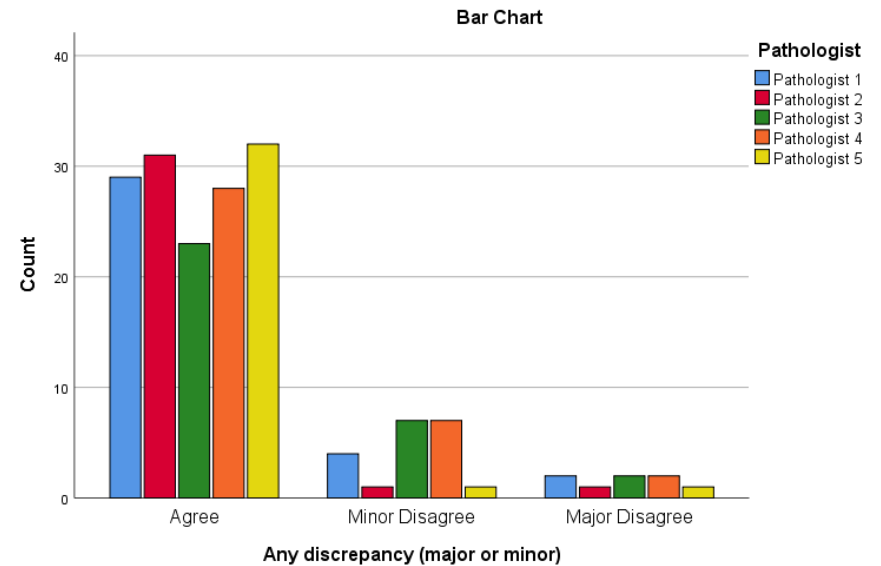

**Figure 3:** Top panel: Distribution of major and minor discrepancies among 5 study pathologists. Bottom left: No significant differences are identified between study pathologists (chi-square test). Bottom right; Bar graph depicting the same data

|                                  |                | Case Type |       |       |
|----------------------------------|----------------|-----------|-------|-------|
|                                  |                | Small     | Large | Total |
| Any discrepancy (major or minor) | Agree          | 104       | 39    | 143   |
|                                  | Minor Disagree | 11        | 9     | 20    |
|                                  | Major Disagree | 3         | 5     | 8     |
| Total                            |                | 118       | 53    | 171   |

#### Chi-Square Tests

|                              | Value | df | Asymptotic<br>Significance (2-<br>sided) |
|------------------------------|-------|----|------------------------------------------|
| Pearson Chi-Square           | 6.473 | 2  | 0.039                                    |
| Likelihood Ratio             | 6.023 | 2  | 0.049                                    |
| Linear-by-Linear Association | 6.435 | 1  | 0.011                                    |
| N of Valid Cases             | 171   |    |                                          |

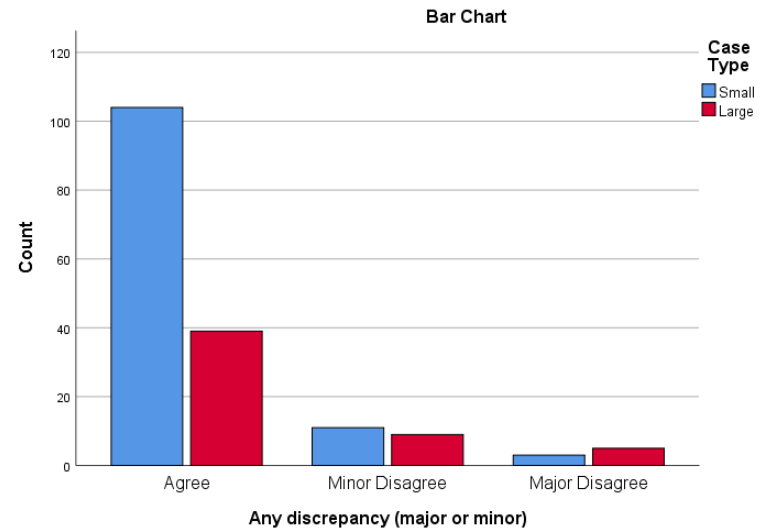

**Figure 4:** Top panel: Distribution of major and minor discrepancies between small and large case types. Bottom left: A small but significant difference is identified in the occurrence of major discrepancies in large case types compared to small ( $p=0.039$ , chi-square test). Bottom right; Bar graph depicting the same data.

|           |                  | Any discrepancy (major or minor) |                |                |       |
|-----------|------------------|----------------------------------|----------------|----------------|-------|
|           |                  | Agree                            | Minor Disagree | Major Disagree | Total |
| Specialty | Breast           | 13                               | 4              | 2              | 19    |
|           | Gastrointestinal | 22                               | 7              | 2              | 31    |
|           | Genitourinary    | 29                               | 2              | 2              | 33    |
|           | Gynecology       | 31                               | 1              | 1              | 33    |
|           | Head and Neck    | 22                               | 4              | 0              | 26    |
|           | Skin             | 22                               | 2              | 0              | 24    |
|           | Thoracic         | 4                                | 0              | 1              | 5     |
| Total     |                  | 143                              | 20             | 8              | 171   |

### Chi-Square Tests

|                    | Value  | df | Asymptotic<br>Significance (2-<br>sided) |
|--------------------|--------|----|------------------------------------------|
| Pearson Chi-Square | 17.275 | 12 | 0.140                                    |
| Likelihood Ratio   | 18.872 | 12 | 0.092                                    |
| N of Valid Cases   | 171    |    |                                          |

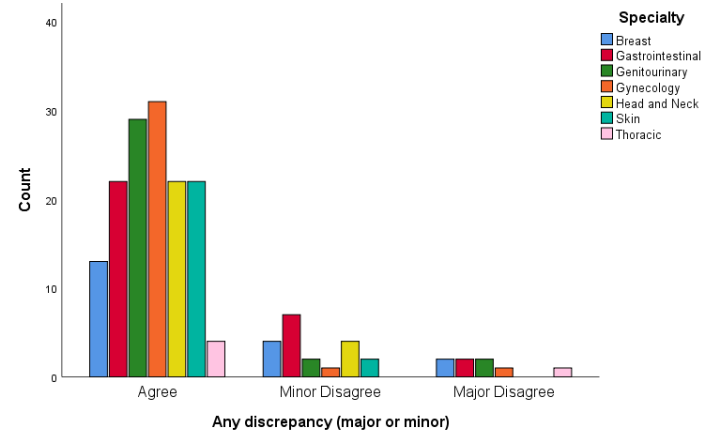

**Figure 5:** Top panel: Distribution of major and minor discrepancies among subspecialties. Bottom left: No significant differences are identified between study pathologists (chi-square test). Bottom right; Bar graph depicting the same data

|                   |          | Pathologist   |               |               |               |               |       |
|-------------------|----------|---------------|---------------|---------------|---------------|---------------|-------|
|                   |          | Pathologist 1 | Pathologist 2 | Pathologist 3 | Pathologist 4 | Pathologist 5 | Total |
| Major discrepancy | Agree    | 33            | 32            | 30            | 35            | 33            | 163   |
|                   | Disagree | 2             | 1             | 2             | 2             | 1             | 8     |
| Total             |          | 35            | 33            | 32            | 37            | 34            | 171   |

### Chi-Square Tests

|                    | Value | df | Asymptotic<br>Significance (2-<br>sided) |
|--------------------|-------|----|------------------------------------------|
| Pearson Chi-Square | 0.736 | 4  | 0.947                                    |
| Likelihood Ratio   | 0.774 | 4  | 0.942                                    |
| N of Valid Cases   | 171   |    |                                          |

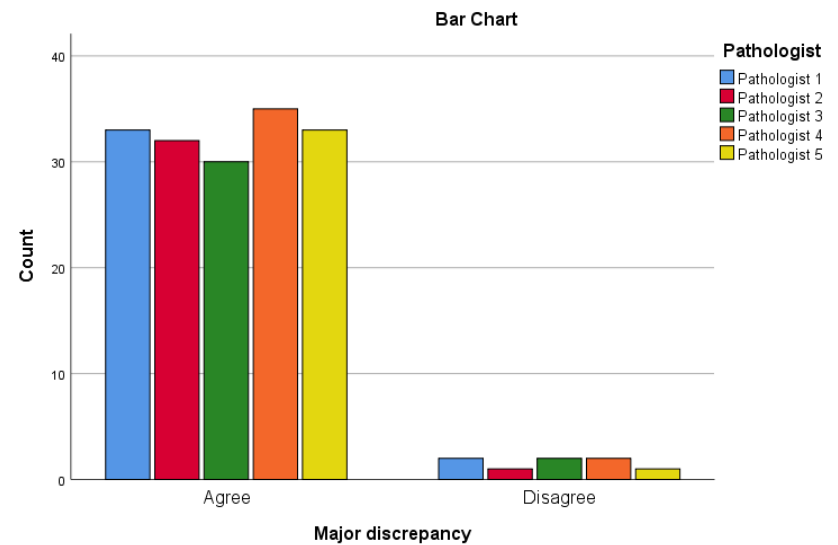

**Figure 6:** Top panel: Distribution of major discrepancies alone among 5 study pathologists. Bottom left: No significant differences are identified between study pathologists (chi-square test). Bottom right; Bar graph depicting the same data

|                   |          | Case Type |       |       |
|-------------------|----------|-----------|-------|-------|
|                   |          | Small     | Large | Total |
| Major discrepancy | Agree    | 115       | 48    | 163   |
|                   | Disagree | 3         | 5     | 8     |
| Total             |          | 118       | 53    | 171   |

|                              | Value | df | Asymptotic<br>Significance (2-<br>sided) | Exact Sig. (2-<br>sided) |
|------------------------------|-------|----|------------------------------------------|--------------------------|
| Pearson Chi-Square           | 3.895 | 1  | 0.048                                    |                          |
| Continuity Correction        | 2.503 | 1  | 0.114                                    |                          |
| Likelihood Ratio             | 3.539 | 1  | 0.060                                    |                          |
| Fisher's Exact Test          |       |    |                                          | 0.109                    |
| Linear-by-Linear Association | 3.872 | 1  | 0.049                                    |                          |
| N of Valid Cases             | 171   |    |                                          |                          |

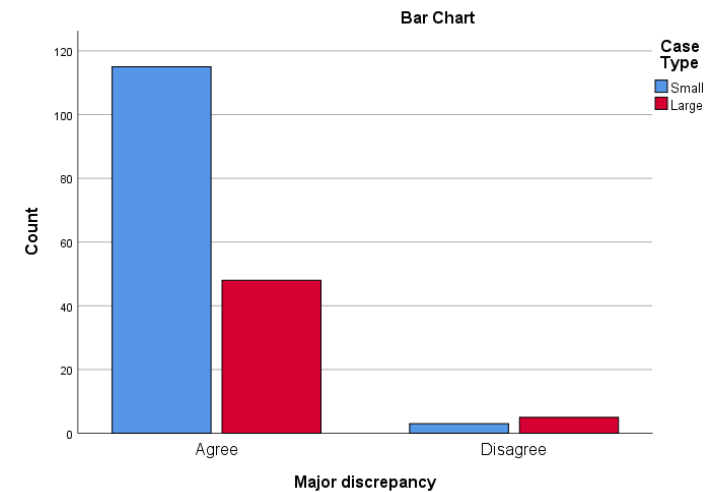

**Figure 7:** Top panel: Distribution of major discrepancies alone among small and large case types. Bottom left: A small but significant difference is identified in the occurrence of major discrepancies in large case types compared to small ( $p=0.048$ , chi-square test). Bottom right; Bar graph depicting the same data.

|                   |          | Specialty |                  |               |            |               |      |          | Total |
|-------------------|----------|-----------|------------------|---------------|------------|---------------|------|----------|-------|
|                   |          | Breast    | Gastrointestinal | Genitourinary | Gynecology | Head and Neck | Skin | Thoracic |       |
| Major discrepancy | Agree    | 17        | 29               | 31            | 32         | 26            | 24   | 4        | 163   |
|                   | Disagree | 2         | 2                | 2             | 1          | 0             | 0    | 1        | 8     |
| Total             |          | 19        | 31               | 33            | 33         | 26            | 24   | 5        | 171   |

**Chi-Square Tests**

|                    | Value | df | Asymptotic<br>Significance (2-<br>sided) |
|--------------------|-------|----|------------------------------------------|
| Pearson Chi-Square | 7.104 | 6  | 0.311                                    |
| Likelihood Ratio   | 7.941 | 6  | 0.242                                    |
| N of Valid Cases   | 171   |    |                                          |

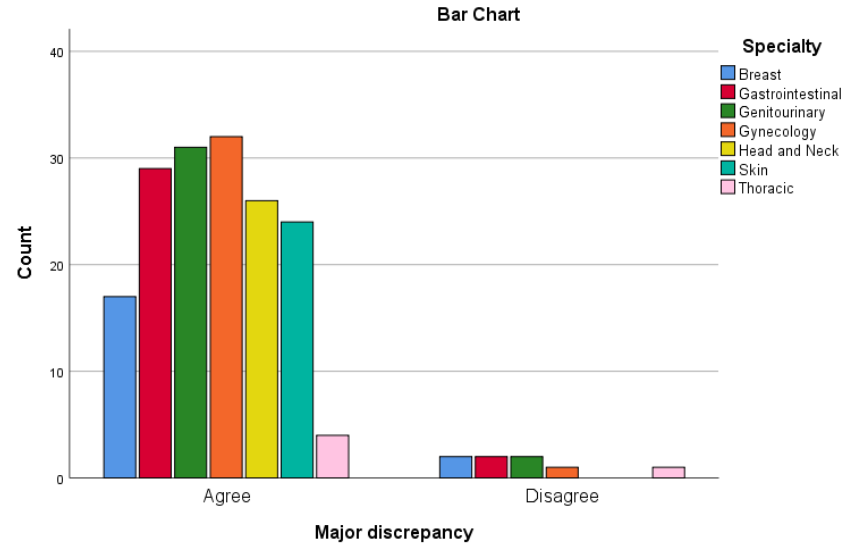

**Figure 8:** Top panel: Distribution of major discrepancies alone among subspecialties. Bottom left: No significant differences are identified between study pathologists (chi-square test). Bottom right; Bar graph depicting the same data
